# Supplementary material
Source: PubMed Central journal article supplement (PMC7203968)
Supplement: NIHMS1552587-supplement-Supp_table_1.pdf [file NIHMS1552587-supplement-Supp_table_1.pdf]

**Supplement Table 1: Disease Classification Codes for Birth Defects Used in the Study**

| Birth Defects                                                        | Disease Classification Codes                                                                         |                                                                                                               |
|----------------------------------------------------------------------|------------------------------------------------------------------------------------------------------|---------------------------------------------------------------------------------------------------------------|
|                                                                      | International Classification of Diseases, 9 <sup>th</sup> Revision, Clinical Modification (ICD-9-CM) | Centers for Disease Control and Prevention/British Pediatric Association Classification of Diseases (CDC/BPA) |
| <b>Central Nervous System</b>                                        |                                                                                                      |                                                                                                               |
| Anencephaly                                                          | 740.0 – 740.1                                                                                        | 740.00 – 740.10                                                                                               |
| Encephalocele                                                        | 742.0                                                                                                | 742.00 – 742.09                                                                                               |
| Spina bifida without anencephaly                                     | 741.0, 741.9<br>w/o 740.0 - 740.1                                                                    | 741.00 – 741.99<br>w/o 740.00 – 740.10                                                                        |
| <b>Eye</b>                                                           |                                                                                                      |                                                                                                               |
| Anophthalmia/microphthalmia                                          | 743.0, 743.1                                                                                         | 743.00 – 743.10                                                                                               |
| <b>Cardiovascular</b>                                                |                                                                                                      |                                                                                                               |
| Atrioventricular septal defect (endocardial cushion defect)          | 745.60, .61, .69                                                                                     | 745.60 – 745.69, 745.487                                                                                      |
| Common truncus (truncus arteriosus)                                  | 745.0                                                                                                | 745.00<br>(excluding 745.01)                                                                                  |
| Transposition of the great arteries (TGA)                            | 745.10, .12, .19                                                                                     | 745.10 – 745.12,<br>745.18 – 745.19                                                                           |
| Dextro-Transposition of great arteries (d-TGA) – for CCHD screening* | 745.10                                                                                               | 745.10, 745.11,<br>745.18, 745.19                                                                             |
| Tetralogy of Fallot                                                  | 745.2                                                                                                | 745.20 – 745.21, 747.31                                                                                       |
| Pulmonary valve atresia and stenosis                                 | 746.01, 746.02                                                                                       | 746.00, 746.01                                                                                                |
| Pulmonary valve atresia – for CCHD screening                         | 746.01                                                                                               | 746.00                                                                                                        |
| Tricuspid valve atresia and stenosis                                 | 746.1                                                                                                | 746.100, 746.106 (excluding<br>746.105)                                                                       |
| Tricuspid valve atresia– for CCHD screening                          | 746.1                                                                                                | 746.100                                                                                                       |
| Ebstein anomaly                                                      | 746.2                                                                                                | 746.20                                                                                                        |
| Aortic valve stenosis                                                | 746.3                                                                                                | 746.30                                                                                                        |
| Hypoplastic left heart syndrome (HLHS)                               | 746.7                                                                                                | 746.70                                                                                                        |
| Coarctation of aorta                                                 | 747.10                                                                                               | 747.10 – 747.19                                                                                               |
| Total anomalous pulmonary venous connection (TAPVC)                  | 747.41                                                                                               | 747.42                                                                                                        |
| Single ventricle                                                     | 745.3                                                                                                | 745.3                                                                                                         |
| Interrupted aortic arch (IAA)                                        | 747.11                                                                                               | 747.215 – 747.217, 747.285                                                                                    |
| Double outlet right ventricle (DORV)                                 | 745.11                                                                                               | 745.13 – 745.15                                                                                               |
| <b>Orofacial</b>                                                     |                                                                                                      |                                                                                                               |
| Cleft palate alone (without cleft lip)                               | 749.0                                                                                                | 749.00 – 749.09                                                                                               |
| Cleft lip alone (without cleft palate)                               | 749.1                                                                                                | 749.10 – 749.19                                                                                               |

| Birth Defects                                | Disease Classification Codes                                                                         |                                                                                                               |
|----------------------------------------------|------------------------------------------------------------------------------------------------------|---------------------------------------------------------------------------------------------------------------|
|                                              | International Classification of Diseases, 9 <sup>th</sup> Revision, Clinical Modification (ICD-9-CM) | Centers for Disease Control and Prevention/British Pediatric Association Classification of Diseases (CDC/BPA) |
| Cleft lip with cleft palate                  | 749.20-749.25                                                                                        | 749.20 – 749.29                                                                                               |
| Choanal atresia                              | 748.0                                                                                                | 748.00                                                                                                        |
| <b>Gastrointestinal</b>                      |                                                                                                      |                                                                                                               |
| Esophageal atresia/tracheoesophageal fistula | 750.3                                                                                                | 750.30 – 750.35                                                                                               |
| Rectal and large intestinal atresia/stenosis | 751.2                                                                                                | 751.20 – 751.24                                                                                               |
| Biliary atresia                              | 751.61                                                                                               | 751.65                                                                                                        |
| Small intestinal atresia/stenosis            | 751.1                                                                                                | 751.10 – 751.19                                                                                               |
| <b>Genitourinary</b>                         |                                                                                                      |                                                                                                               |
| Renal agenesis/hypoplasia                    | 753.0                                                                                                | 753.00 – 753.01                                                                                               |
| Bladder exstrophy                            | 753.5                                                                                                | 753.50                                                                                                        |
| <b>Musculoskeletal</b>                       |                                                                                                      |                                                                                                               |
| Gastroschisis                                | 756.73                                                                                               | 756.71                                                                                                        |
| Omphalocele                                  | 756.72                                                                                               | 756.70                                                                                                        |
| Diaphragmatic hernia                         | 756.6                                                                                                | 756.610 – 756.617                                                                                             |
| Limb deficiencies (reduction defects)        | 755.2 – 755.4                                                                                        | 755.20 – 755.49                                                                                               |
| Clubfoot                                     | 754.51, 754.70                                                                                       | 754.50, 754.73 (excluding 754.735)                                                                            |
| <b>Chromosomal</b>                           |                                                                                                      |                                                                                                               |
| Trisomy 13                                   | 758.1                                                                                                | 758.10 – 758.19                                                                                               |
| Trisomy 21 (Down syndrome)                   | 758.0                                                                                                | 758.00 – 758.09                                                                                               |
| Trisomy 18                                   | 758.2                                                                                                | 758.20 – 758.29                                                                                               |

ICD-9-CM: International Classification of Diseases, 9th Revision, Clinical Modification; CDC/BPA: Centers for Disease Control and Prevention/British Pediatric Association Classification of Diseases

\* Critical congenital heart defects targeted for newborn screening.

The text description of the CDC/BPA codes is available at

<http://www.nbdpn.org/current/resources/sgm/MACDPcode%200807.pdf>.
