# Supplementary material
Source: PubMed Central journal article supplement (PMC7203968)
Supplement: NIHMS1552587-supplement-Supp_table_2.pdf [file NIHMS1552587-supplement-Supp_table_2.pdf]

**Supplement Table 2: Birth Defects Counts and Prevalence (Prevalence per 10,000 live births), 2010-2014 by Case-finding Methodology**

|                                                                   | Active case-finding<br>(n=16) | Passive case-finding<br>without follow-up<br>(n=13) | Passive case-finding<br>with follow-up (n=10) | Total                       | Note |
|-------------------------------------------------------------------|-------------------------------|-----------------------------------------------------|-----------------------------------------------|-----------------------------|------|
|                                                                   | Count<br>Prev (95%CI)         | Count<br>Prev (95%CI)                               | Count<br>Prev (95%CI)                         | Count<br>Prev (95%CI)       |      |
| <i>Central Nervous System</i>                                     |                               |                                                     |                                               |                             |      |
| Anencephalus                                                      | 1,306<br>2.37 (2.25, 2.51)    | 466<br>1.32 (1.20, 1.45)                            | 379<br>0.79 (0.71, 0.87)                      | 2,151<br>1.56 (1.49, 1.62)  |      |
| Encephalocele                                                     | 559<br>1.02 (0.93, 1.10)      | 285<br>0.84 (0.74, 0.94)                            | 326<br>0.68 (0.61, 0.76)                      | 1,170<br>0.85 (0.81, 0.90)  | 1    |
| Spina bifida without<br>anencephalus                              | 2,082<br>3.78 (3.62, 3.95)    | 1,241<br>3.52 (3.32, 3.72)                          | 1,293<br>2.70 (2.55, 2.85)                    | 4,616<br>3.34 (3.24, 3.44)  |      |
| <i>Eye</i>                                                        |                               |                                                     |                                               |                             |      |
| Anophthalmia /<br>microphthalmia                                  | 1,067<br>1.95 (1.83, 2.07)    | 321<br>0.94 (0.84, 1.05)                            | 469<br>0.99 (0.91, 1.09)                      | 1,857<br>1.36 (1.30, 1.43)  | 2    |
| <i>Cardiovascular</i>                                             |                               |                                                     |                                               |                             |      |
| Atrioventricular septal<br>defect (Endocardial<br>cushion defect) | 2,913<br>5.38 (5.19, 5.58)    | 1,455<br>4.28 (4.06, 4.50)                          | 1,800<br>3.79 (3.61, 3.97)                    | 6,168<br>4.54 (4.43, 4.66)  | 3    |
| Coarctation of the aorta                                          | 3,002<br>5.51 (5.32, 5.71)    | 2,805<br>8.25 (7.94, 8.56)                          | 2,335<br>4.87 (4.68, 5.07)                    | 8,142<br>5.97 (5.84, 6.10)  | 4    |
| Common truncus (truncus<br>arteriosus)                            | 366<br>0.67 (0.60, 0.74)      | 355<br>1.01 (0.90, 1.12)                            | 258<br>0.54 (0.47, 0.61)                      | 979<br>0.71 (0.67, 0.76)    | 5    |
| Double outlet right<br>ventricle                                  | 899<br>1.69 (1.58, 1.81)      | 718<br>2.11 (1.96, 2.27)                            | 845<br>1.78 (1.66, 1.90)                      | 2,462<br>1.83 (1.76, 1.90)  | 6    |
| Ebstein anomaly                                                   | 425<br>0.77 (0.70, 0.85)      | 303<br>0.91 (0.81, 1.02)                            | 289<br>0.61 (0.54, 0.68)                      | 1,017<br>0.75 (0.70, 0.80)  | 7    |
| Hypoplastic left heart<br>syndrome (HLHS)                         | 1,404<br>2.55 (2.42, 2.69)    | 954<br>2.72 (2.55, 2.90)                            | 1,074<br>2.24 (2.11, 2.38)                    | 3,432<br>2.49 (2.40, 2.57)  | 8    |
| Interrupted aortic arch                                           | 292<br>0.60 (0.54, 0.68)      | 266<br>0.78 (0.69, 0.88)                            | 278<br>0.59 (0.52, 0.66)                      | 836<br>0.65 (0.60, 0.69)    | 9    |
| Pulmonary valve atresia<br>and stenosis                           | 5,228<br>9.50 (9.24, 9.76)    | 2,842<br>8.36 (8.05, 8.67)                          | 3,448<br>7.19 (6.96, 7.44)                    | 11,518<br>8.41 (8.26, 8.56) | 1    |
| Pulmonary valve atresia                                           | 762<br>1.38 (1.29, 1.49)      | 496<br>1.65 (1.50, 1.80)                            | 410<br>0.94 (0.85, 1.03)                      | 1,668<br>1.29 (1.23, 1.36)  | 10   |
| Single Ventricle                                                  | 388<br>0.76 (0.69, 0.84)      | 419<br>1.23 (1.12, 1.36)                            | 317<br>0.67 (0.60, 0.75)                      | 1,124<br>0.85 (0.80, 0.90)  | 11   |
| Tetralogy of Fallot                                               | 2,498<br>4.54 (4.36, 4.72)    | 1,473<br>4.17 (3.96, 4.39)                          | 2,033<br>4.24 (4.06, 4.43)                    | 6,004<br>4.34 (4.23, 4.45)  |      |
| Total anomalous<br>pulmonary venous<br>connection                 | 727<br>1.36 (1.26, 1.46)      | 316<br>0.93 (0.83, 1.04)                            | 420<br>0.89 (0.81, 0.98)                      | 1,463<br>1.09 (1.03, 1.14)  | 12   |
| Transposition of the great<br>arteries                            | 1,922<br>3.71 (3.55, 3.88)    | 1,083<br>3.07 (2.89, 3.26)                          | 1,081<br>2.26 (2.12, 2.39)                    | 4,086<br>3.03 (2.93, 3.12)  | 13   |
| Dextro-transposition of<br>great arteries (d-TGA)                 | 1,541<br>2.98 (2.83, 3.13)    | 730<br>2.42 (2.25, 2.60)                            | 868<br>2.01 (1.88, 2.15)                      | 3,139<br>2.51 (2.42, 2.60)  | 14   |
| Tricuspid valve atresia and<br>stenosis                           | 853<br>1.66 (1.55, 1.78)      | 374<br>1.10 (0.99, 1.22)                            | 1,062<br>2.25 (2.11, 2.39)                    | 2,289<br>1.73 (1.66, 1.80)  | 15   |
| Tricuspid valve atresia                                           | 483<br>0.99 (0.90, 1.08)      | 55<br>0.85 (0.64, 1.11)                             | 184<br>0.74 (0.64, 0.86)                      | 722<br>0.90 (0.84, 0.97)    | 16   |
| <i>Orofacial</i>                                                  |                               |                                                     |                                               |                             |      |
| Cleft lip with and without<br>cleft palate                        | 5,476<br>10.06 (9.79, 10.33)  | 3,243<br>9.19 (8.88, 9.51)                          | 3,602<br>7.52 (7.27, 7.77)                    | 12,321<br>8.95 (8.79, 9.11) | 17   |

|                                              | Active case- finding<br>(n=16) | Passive case-finding<br>without follow-up<br>(n=13) | Passive case-finding<br>with follow-up (n=10) | Total                          | Note |
|----------------------------------------------|--------------------------------|-----------------------------------------------------|-----------------------------------------------|--------------------------------|------|
|                                              | Count<br>Prev (95%CI)          | Count<br>Prev (95%CI)                               | Count<br>Prev (95%CI)                         | Count<br>Prev (95%CI)          |      |
| Cleft lip with cleft palate                  | 3,614<br>6.57 (6.36, 6.79)     | 2,041<br>5.78 (5.54, 6.04)                          | 2,332<br>4.87 (4.67, 5.07)                    | 7,987<br>5.78 (5.65, 5.91)     |      |
| Cleft lip alone                              | 1,897<br>3.48 (3.33, 3.64)     | 1,202<br>3.41 (3.22, 3.60)                          | 1,270<br>2.65 (2.51, 2.80)                    | 4,369<br>3.17 (3.08, 3.27)     | 17   |
| Cleft palate alone                           | 3,234<br>5.88 (5.68, 6.08)     | 2,059<br>5.83 (5.59, 6.09)                          | 2,650<br>5.53 (5.32, 5.74)                    | 7,943<br>5.75 (5.62, 5.87)     |      |
| <i>Gastrointestinal</i>                      |                                |                                                     |                                               |                                |      |
| Esophageal atresia/tracheoesophageal fistula | 1,250<br>2.35 (2.23, 2.49)     | 858<br>2.52 (2.36, 2.70)                            | 1,040<br>2.19 (2.06, 2.32)                    | 3,148<br>2.34 (2.26, 2.42)     | 18   |
| Rectal and large intestinal atresia/stenosis | 2,235<br>4.50 (4.32, 4.69)     | 1,468<br>4.32 (4.10, 4.54)                          | 1,714<br>3.61 (3.44, 3.78)                    | 5,417<br>4.13 (4.02, 4.24)     | 19   |
| <i>Musculoskeletal</i>                       |                                |                                                     |                                               |                                |      |
| Clubfoot                                     | 6,778<br>16.31 (15.93, 16.71)  | 4,719<br>13.87 (13.48, 14.27)                       | 5,560<br>11.84 (11.53, 12.15)                 | 17,057<br>13.92 (13.71, 14.13) | 20   |
| Diaphragmatic hernia                         | 1,492<br>2.82 (2.68, 2.97)     | 1,003<br>2.95 (2.77, 3.14)                          | 1,146<br>2.41 (2.27, 2.55)                    | 3,641<br>2.71 (2.62, 2.80)     | 21   |
| Gastroschisis                                | 2,863<br>5.20 (5.01, 5.40)     | 1,337<br>4.80 (4.54, 5.06)                          | 1,502<br>3.23 (3.07, 3.40)                    | 5,702<br>4.41 (4.29, 4.52)     | 22   |
| Limb deficiencies (reduction defects)        | 2,827<br>5.16 (4.97, 5.35)     | 1,418<br>4.05 (3.84, 4.26)                          | 1,665<br>3.47 (3.31, 3.65)                    | 5,910<br>4.29 (4.18, 4.40)     | 23   |
| Omphalocele                                  | 1,327<br>2.41 (2.28, 2.54)     | 608<br>2.04 (1.88, 2.21)                            | 707<br>1.52 (1.41, 1.64)                      | 2,642<br>2.01 (1.94, 2.09)     | 24   |
| <i>Chromosomal</i>                           |                                |                                                     |                                               |                                |      |
| Trisomy 13                                   | 773<br>1.40 (1.31, 1.51)       | 343<br>0.97 (0.87, 1.08)                            | 369<br>0.78 (0.70, 0.86)                      | 1,485<br>1.08 (1.02, 1.13)     | 25   |
| Trisomy 18                                   | 1,749<br>3.18 (3.03, 3.33)     | 691<br>1.96 (1.81, 2.11)                            | 780<br>1.64 (1.53, 1.76)                      | 3,220<br>2.34 (2.26, 2.42)     | 25   |
| Trisomy 21 (Down syndrome)                   | 8,153<br>14.82 (14.50, 15.14)  | 4,831<br>13.69 (13.31, 14.08)                       | 6,131<br>12.79 (12.48, 13.12)                 | 19,115<br>13.83 (13.63, 14.03) |      |

Prev=prevalence; CI=confidence intervals

States contributing to the category 'Active case finding': Arizona (2010-2013), Arkansas (2010-2013), California, Delaware, Georgia (Metropolitan Atlanta), Hawaii (2012), Iowa, Louisiana, Massachusetts, Minnesota, North Carolina, Oklahoma, Puerto Rico, South Carolina, Texas, Utah . Total live births=5,502,807.

States contributing to the category 'Passive case finding': Colorado, Kansas, Michigan (2010-2013), Mississippi, Missouri, Nebraska, Nevada, New Mexico, Oregon, Tennessee, Virginia, West Virginia, Wisconsin . Total live births=3,528,713.

States contributing to the category 'Passive case finding with follow-up': Florida, Illinois, Indiana, Kentucky, Maine, Maryland, New Jersey, New York, Rhode Island, Vermont . Total live births=4,792,252.

1. Excludes New Mexico.

2. Excludes Hawaii, New Mexico, Vermont. Maine data excludes 2010-2012.

3. Excludes New Mexico. Arizona data excludes 2010, 2014, Maine data excludes 2010-2012.

4. Excludes New Mexico. South Carolina data excludes 2011.

5. Excludes Hawaii.

6. Excludes Hawaii, New Mexico. Arizona data excludes 2010-2011, 2014, Maine data excludes 2012-2014.

7. Excludes New Mexico. Delaware data excludes 2011, Maine data excludes 2010-2012, Nevada data excludes 2013-2014.

8. New Mexico data excludes 2011.

9. Excludes Hawaii, Minnesota, New Mexico, Vermont. Arizona data excludes 2010-2011, 2014, Delaware data excludes 2010-2012, Maine data excludes 2012-2014, Puerto Rico data excludes 2010-2013, South Carolina data excludes 2010-2012.

10. Excludes Indiana, Kansas, Mississippi, New Mexico.

11. Excludes Hawaii, New Mexico, Vermont. Maine data excludes 2012-2013, Puerto Rico data excludes 2010-2013, South Carolina data excludes 2010-2013.

12. Excludes Maine, New Mexico, Vermont. Delaware data excludes 2011, Minnesota data excludes 2010-2012, South Carolina data excludes 2010.

13. Excludes California.

14. Excludes Hawaii, Indiana, Kansas, Maine, Minnesota, Mississippi, New Mexico, Puerto Rico.

15. Excludes Maine, Minnesota, New Mexico, Utah.

16. Excludes Arizona, Florida, Indiana, Kansas, Kentucky, Michigan, Mississippi, Missouri, Nebraska, Nevada, New Jersey, New Mexico, Oregon, South Carolina, Tennessee, Vermont, Virginia, West Virginia.
17. South Carolina data excludes 2011.
18. Excludes New Mexico, Puerto Rico. Maine data excludes 2010-2012.
19. Excludes Arizona, New Mexico, Puerto Rico. Maine data excludes 2010-2012.
20. Excludes Arizona, California, Hawaii, Maine, Minnesota, New Mexico, South Carolina, Utah, Vermont.
21. Excludes Hawaii, New Mexico, Puerto Rico. Maine data excludes 2010-2012.
22. Excludes Mississippi, Nevada, Wisconsin. Maryland data excludes 2013-2014, West Virginia data excludes 2010-2012.
23. Excludes Hawaii. New Mexico data excludes 2011.
24. Excludes Mississippi, Nevada, New Mexico. Maryland data excludes 2013-2014, West Virginia data excludes 2010-2012.
25. Maine data excludes 2010-2012.
